# Supplementary material
Source: Springer Nature journal article supplement (https://www.springermedizin.de/resource/supplementary/12931_2011_1177_MOESM4_ESM.pdf/9425474)

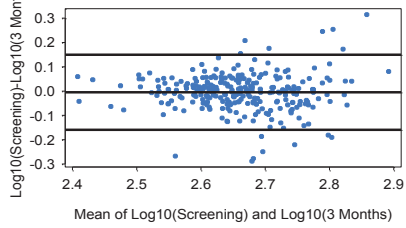

Fibrinogen

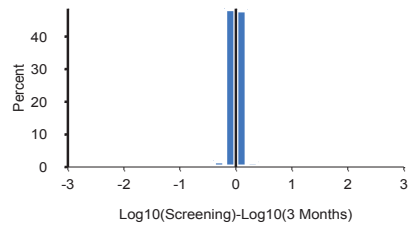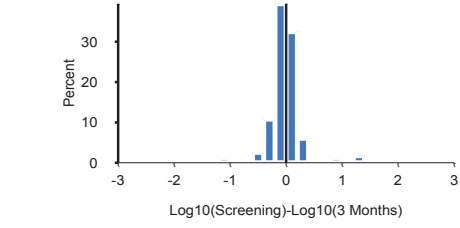

CCL18

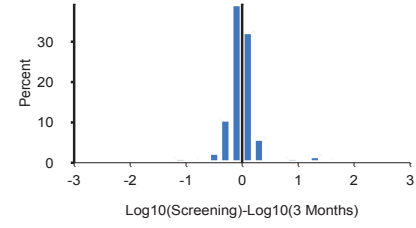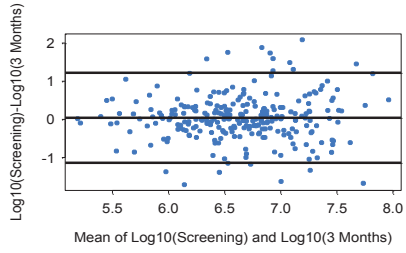

C-reactive protein

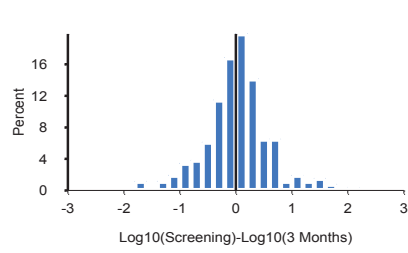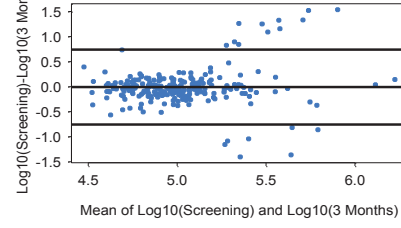

Myeloperoxidase

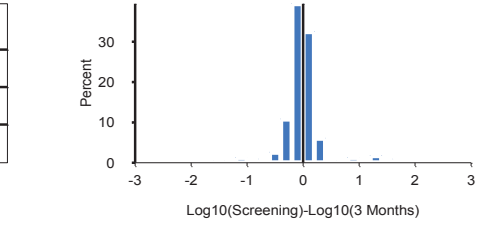

Interleukin-8

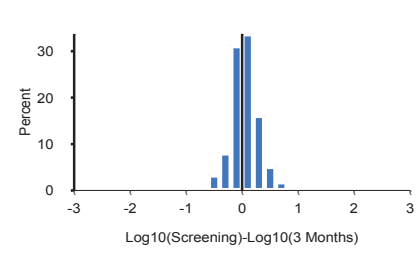

Hepatocyte Growth Factor

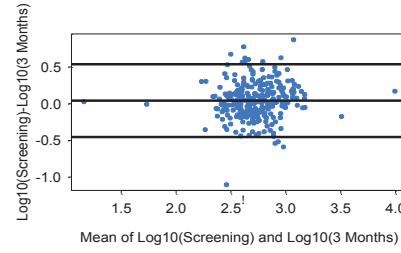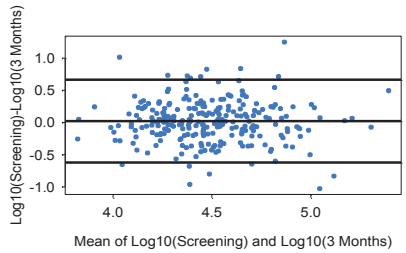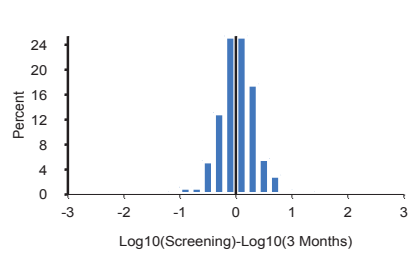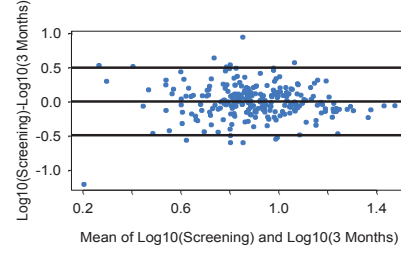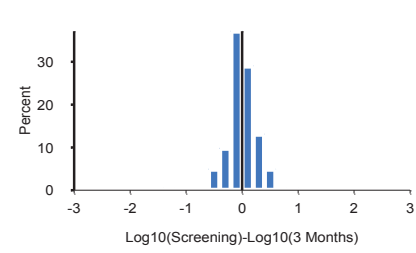

Supplement: MOESM4 [file 9425474]
